# Supplementary material for: Associations between Frailty and Ambient Temperature in Winter: Findings from a Population-Based Study
Source: MDPI journal article supplement (doi:10.3390/ijerph20010513), 2022-12-28
Supplement: s1 [file s1]

## Supplementary Material

**Table S1.** List of items included in the Frailty Index

| No. | Items                                                                                |
|-----|--------------------------------------------------------------------------------------|
| 1   | IADLs: Unable to visit neighbors by oneself                                          |
| 2   | IADLs: Unable to shop by oneself if necessary                                        |
| 3   | IADLs: Unable to cook meals by oneself if necessary                                  |
| 4   | IADLs: Unable to wash clothing by oneself                                            |
| 5   | IADLs: Unable to walk continuously for 1 kilometer                                   |
| 6   | IADLs: Unable to lift a weight of 5 kg (such as a heavy bag of groceries)            |
| 7   | IADLs: Unable to continuously crouch and stand up three times                        |
| 8   | IADLs: Unable to use public transportation                                           |
| 9   | Functional limitations: Unable to put hand behind neck                               |
| 10  | Functional limitations: Unable to put hand behind lower back                         |
| 11  | Functional limitations: Unable to raise arm upright                                  |
| 12  | Functional limitations: Unable to stand up from sitting in a chair                   |
| 13  | Functional limitations: Unable to pick up a book from the floor                      |
| 14  | ADLs: Needs assistance bathing                                                       |
| 15  | ADLs: Needs assistance dressing                                                      |
| 16  | ADLs: Needs assistance toileting                                                     |
| 17  | ADLs: Needs assistance in indoor transferring                                        |
| 18  | ADLs: Needs assistance eating                                                        |
| 19  | ADLs: Incontinence                                                                   |
| 20  | Cognitively impaired (based on the Mini Mental State Examination)                    |
| 21  | Poor self-rated health                                                               |
| 22  | Health worsened in the past year                                                     |
| 23  | Poor interviewer-rated health                                                        |
| 24  | Hearing loss                                                                         |
| 25  | Vision loss                                                                          |
| 26  | Abnormal heart rhythm                                                                |
| 27  | Symptom of psychological distress (based on loneliness, usefulness, and fearfulness) |
| 28  | Number of serious illnesses in the past 2 years                                      |
| 29  | Suffering from hypertension                                                          |
| 30  | Suffering from diabetes                                                              |
| 31  | Suffering from tuberculosis                                                          |
| 32  | Suffering from heart disease                                                         |
| 33  | Suffering from stroke/cerebrovascular disease                                        |
| 34  | Suffering from bronchitis, emphysema, asthma, or pneumonia                           |
| 35  | Suffering from cancer                                                                |
| 36  | Suffering from arthritis                                                             |
| 37  | Suffering from bedsores                                                              |
| 38  | Suffering from gastric or duodenal ulcers                                            |
| 39  | Suffering from Parkinson's disease                                                   |

Abbreviations: IADLs instrumental activities of daily living; ADLs activities of daily living.

Note: Item No. 28 was assigned a value of 2.

**Table S2.** Average temperature in January, FI, and age for the participants with or without subsequent surveys in the first survey

| Variables                  | All participants<br>(N=21,602) | Participants with<br>subsequent surveys<br>(N=9421) | Participants without subsequent surveys |                   |                   |
|----------------------------|--------------------------------|-----------------------------------------------------|-----------------------------------------|-------------------|-------------------|
|                            |                                |                                                     | All<br>(N=12,181)                       | Death<br>(N=7883) | Lost<br>(N=4298)  |
| FI, median (IQR)           | 0.17 (0.22)                    | 0.12 (0.14)                                         | 0.24 (0.25)                             | 0.27 (0.24)       | 0.17 (0.23)       |
| Age (years), mean $\pm$ SD | 87.71 $\pm$ 11.59              | 82.81 $\pm$ 11.32                                   | 91.51 $\pm$ 10.30                       | 93.76 $\pm$ 8.61  | 87.38 $\pm$ 11.77 |

Abbreviations: N number; SD standard deviation; IQR interquartile range.

**Table S3.** Logistic regression analysis for average temperature in January and frailty in the first survey

| Variables                        | Age adjusted OR (95%CI) |                      | Fully adjusted OR (95%CI) |                      |
|----------------------------------|-------------------------|----------------------|---------------------------|----------------------|
|                                  | Pre-frail               | Frail                | Pre-frail                 | Frail                |
| Quartiles of AT in January       |                         |                      |                           |                      |
| Q4                               | Reference               | Reference            | Reference                 | Reference            |
| Q3                               | 1.05 (0.95, 1.15)       | 1.26 (1.14, 1.40)*** | 0.99 (0.89, 1.09)         | 1.05 (0.93, 1.19)    |
| Q2                               | 1.26 (1.13, 1.39)***    | 1.89 (1.69, 2.10)*** | 1.22 (1.08, 1.37)**       | 1.51 (1.31, 1.74)*** |
| Q1                               | 1.25 (1.13, 1.39)***    | 2.23 (1.99, 2.50)*** | 1.32 (1.12, 1.55)***      | 1.81 (1.49, 2.20)*** |
| 1-unit decrease of AT in January | 1.01 (1.00, 1.01)***    | 1.04 (1.03, 1.04)*** | 1.01 (1.00, 1.01)*        | 1.03 (1.02, 1.04)*** |

Abbreviations: AT in January, Average temperature in January; Q1 1st quartile; Q2 2nd quartile; Q3 3rd quartile; Q4 4th quartile; 95%CI 95% confidence interval; OR odds ratio.

Note: In the fully adjusted model, ORs were adjusted for age, sex, ethnicity, residence, current marital status, education, occupation, family income last year, smoking at the present, drinking at the present, exercising at the present, social and leisure activity index, yearly rainfall and geographic regions. Note that temperature change was not included in the fully adjusted model due to the high correlation with average temperature in January.

\*\*\*  $p < 0.001$ , \*\*  $p < 0.01$ , \*  $p < 0.05$

**Table S4.** GEE analysis for the associations between average temperature in January and frailty

| Variables                  | Age adjusted OR (95%CI) |                      | Fully adjusted OR (95%CI) |                      |
|----------------------------|-------------------------|----------------------|---------------------------|----------------------|
|                            | Pre-frail               | Frail                | Pre-frail                 | Frail                |
| Quartiles of AT in January |                         |                      |                           |                      |
| Q4                         | Reference               | Reference            | Reference                 | Reference            |
| Q3                         | 1.23 (1.12, 1.35)***    | 1.28 (1.14, 1.44)*** | 1.17 (1.06, 1.29)**       | 1.14 (1.00, 1.30)    |
| Q2                         | 1.28 (1.16, 1.41)***    | 1.71 (1.51, 1.92)*** | 1.22 (1.09, 1.37)***      | 1.25 (1.08, 1.46)**  |
| Q1                         | 1.35 (1.22, 1.49)***    | 2.23 (1.97, 2.53)*** | 1.35 (1.15, 1.58)***      | 1.64 (1.33, 2.01)*** |

|                                  |                      |                      |                    |                      |
|----------------------------------|----------------------|----------------------|--------------------|----------------------|
| 1-unit decrease of AT in January | 1.01 (1.00, 1.01)*** | 1.03 (1.03, 1.04)*** | 1.01 (1.00, 1.02)* | 1.02 (1.01, 1.03)*** |
|----------------------------------|----------------------|----------------------|--------------------|----------------------|

Abbreviations: AT in January, Average temperature in January; Q1 1st quartile; Q2 2nd quartile; Q3 3rd quartile; Q4 4th quartile; 95%CI 95% confidence interval; OR odds ratio.

Note: In the fully adjusted model, ORs were adjusted for age, sex, ethnicity, residence, current marital status, education, occupation, family income last year, smoking at the present, drinking at the present, exercising at the present, social and leisure activity index, yearly rainfall and geographic regions. Note that temperature change was not included in the fully adjusted model due to the high correlation with average temperature in January.

\*\*\*  $p < 0.001$ , \*\*  $p < 0.01$ , \*  $p < 0.05$

**Table S5.** GLMM analysis for the associations between average temperature in January and frailty with original data

Abbreviations: AT in January, Average temperature in January; Q1 1st quartile; Q2 2nd quartile; Q3 3rd

| Variables                        | Age adjusted OR (95%CI) |                      | Fully adjusted OR (95%CI) |                      |
|----------------------------------|-------------------------|----------------------|---------------------------|----------------------|
|                                  | Pre-frail               | Frail                | Pre-frail                 | Frail                |
| Quartiles of AT in January       |                         |                      |                           |                      |
| Q4                               | Reference               | Reference            | Reference                 | Reference            |
| Q3                               | 1.18 (1.13, 1.24)***    | 1.31 (1.22, 1.40)*** | 1.18 (1.12, 1.24)**       | 1.31 (1.21, 1.41)*** |
| Q2                               | 1.37 (1.30, 1.44)***    | 1.95 (1.82, 2.09)*** | 1.37 (1.29, 1.46)***      | 1.73 (1.58, 1.90)*** |
| Q1                               | 1.33 (1.26, 1.40)***    | 2.35 (2.19, 2.51)*** | 1.39 (1.28, 1.52)***      | 1.99 (1.76, 2.24)*** |
| 1-unit decrease of AT in January | 1.01 (1.00, 1.01)***    | 1.04 (1.04, 1.05)*** | 1.01 (1.00, 1.02)*        | 1.03 (1.02, 1.04)*** |

quartile; Q4 4th quartile; 95%CI 95% confidence interval; OR odds ratio.

Note: In the fully adjusted model, ORs were adjusted for age, sex, ethnicity, residence, current marital status, education, occupation, family income last year, smoking at the present, drinking at the present, exercising at the present, social and leisure activity index, yearly rainfall and geographic regions. Note that temperature change was not included in the fully adjusted model due to the high correlation with average temperature in January.

\*\*\*  $p < 0.001$ , \*\*  $p < 0.01$ , \*  $p < 0.05$
